# Supplementary material for: Theoretical Prediction of the Complex P-Glycoprotein Substrate Efflux Based on the Novel Hierarchical Support Vector Regression Scheme
Source: Molecules. 2018 Jul 22;23(7):1820. doi: 10.3390/molecules23071820 (PMC6100076; doi:10.3390/molecules23071820)
Supplement: Supplementary file 1 [file molecules-23-01820-s001.zip › molecules-332763-Supplementary Tables-revised-original.xls]

## Sheet: Table S1
Table S1. Selected compounds for this study, their names, SMILES strings, CAS numbers, observed log ER values and predicted values by SVR A, SVR B, and HSVR, data partitions, and references
No.	Molecules	Smiles	CAS	log ER						Ref
				Obs.	SVR A	SVR B	SVR C	HSVR	Set
1	5-HMT	Oc1ccc(cc1[C@@]([H])(CCN(C(C)(C)[H])C(C)(C)[H])c2ccccc2)CO	NA†	1.13672	1.03602	1.07974	1.21011	1.1712	T	Callegari et al. 2011
2	Acebutolol	O[C@]([H])(COc1ccc(NC(=O)CCC)cc1C(=O)C)CNC(C)(C)[H]	37517-30-9	1.48734	1.13096	1.37035	1.04019	1.21126	t	Troutman et al. 2003
3	Amisulpride	O=[S](=O)(CC)c2cc(C(=O)NC[C@]1([H])CCCN1CC)c(OC)cc2N	53583-79-2	0.963788	0.863974	0.959978	0.970224	0.9493	T	Wager et al. 2010
4	Amprenavir	CC(C)([H])CN(C[C@](O)([H])[C@]([H])(NC(=O)O[C@@]1([H])COCC1)Cc2ccccc2)[S](=O)(=O)c3ccc(N)cc3	161814-49-9	1.43828	1.22119	1.21542	1.75093	1.40951	t	Polli et al. 2001 Mahar et al. 2002 Carrara et al. 2007
5	Apomorphine	Oc4c1c(C[C@]3([H])c2c1cccc2CCN3C)ccc4O	41372-20-7	0.838849	0.73797	0.781718	0.831754	0.767344	T	Wager et al. 2010
6	Aprepitant	[F]C([F])([F])c1cc(cc(c1)C([F])([F])[F])[C@](C)([H])O[C@@]3([H])OCCN(Cc2nn([H])c(=O)n2[H])[C@]3([H])c4ccc([F])cc4	170729-80-3	0.740363	0.840074	1.04557	0.746254	0.859226	T	Wager et al. 2010
7	Astemizole	[F]c1ccc(cc1)Cn3c2ccccc2nc3N[C@]5([H])CCN(CCc4ccc(OC)cc4)CC5	68844-77-9	0.340444	0.767812	0.112874	0.773496	0.61496	t	Mahar et al. 2002 Carrara et al. 2007
8	Atomoxetine	Cc1ccccc1O[C@]([H])(CCNC)c2ccccc2	82248-59-7	0.39794	0.497968	0.45424	0.404204	0.440476	T	Wager et al. 2010
9	Bromocriptine	[Br]c2n([H])c1cccc3c1c2C[C@]4([H])N(C)C[C@]([H])(C=C34)C(=O)N[C@]5(O[C@@]6(O)N(C5=O)[C@@]([H])(CC(C)(C)[H])C(=O)N7CCC[C@@]67[H])C(C)(C)[H]	25614-03-3	0.547775	0.648008	0.604242	0.554358	0.549204	T	Mahar et al. 2002 Wager et al. 2010
10	Cabergoline	O=C(N(CCCN(C)C)C(=O)NCC)[C@@]4([H])C[C@@]3([H])c1cccc2c1c(cn2[H])C[C@@]3([H])N(C4)CC=C	81409-90-7	1.15534	0.899706	1.09979	1.00753	1.03494	T	Wager et al. 2010
11	Cetirizine	[Cl]c1ccc(cc1)[C@@]([H])(c2ccccc2)N3CCN(CCOCC(O)=O)CC3	83881-51-0	1.4119	1.312	1.35576	1.40576	1.41044	T	Mahar et al. 2002 Chen et al. 2003 Obradovic et al. 2007
12	Chloroquine	[Cl]c2cc1nccc(N[C@@](C)([H])CCCN(CC)CC)c1cc2	54-05-7	0.583199	0.684014	0.640194	0.577702	0.57864	T	Polli et al. 2001
13	Cimetidine	N#CNC(NCC[S]Cc1ncn([H])c1C)=NC	51481-61-9	0.544481	0.880118	0.64872	1.09067	0.90078	t	Polli et al. 2001 Mahar et al. 2002 Carrara et al. 2007
14	Clarithromycin	C[C@@]2([H])[C@@]([H])(O[C@]1([H])C[C@](C)(OC)[C@@](O)([H])[C@@](C)([H])O1)[C@@](C)([H])C(=O)O[C@]([H])(CC)[C@@](C)(O)[C@](O)([H])[C@@](C)([H])C(=O)[C@@](C)([H])C[C@](C)(OC)[C@]2([H])O[C@]3([H])O[C@@](C)([H])C[C@@]([H])(N(C)C)[C@@]3(O)[H]	81103-11-9	1.49554	1.39601	1.43973	1.48982	1.46592	T	Polli et al. 2001
15	Clomipramine	[Cl]c3cc2N(CCCN(C)C)c1ccccc1CCc2cc3	303-49-1	0.789581	0.733262	0.369204	0.6949	0.58189	t	Mahar et al. 2002 Wager et al. 2010
16	Colchicine	COc3cc2CC[C@@]([H])(NC(C)=O)c1cc(=O)c(ccc1c2c(OC)c3OC)OC	64-86-8	1.17513	1.07603	1.23229	1.18222	1.22364	T	Polli et al. 2001 Troutman et al. 2003
17	Darifenacin	O=C(N)C(c1ccccc1)(c2ccccc2)[C@]5([H])CN(CCc4ccc3OCCc3c4)CC5	133099-04-4	0.60206	0.702016	0.658206	0.595794	0.596712	T	Callegari et al. 2011
18	Daunorubicin	N[C@@]5([H])C[C@@]([H])(O[C@]1([H])C[C@](O)(Cc2c1c(O)c4c(c2O)C(=O)c3cccc(OC)c3C4=O)C(=O)C)O[C@](C)([H])[C@]5(O)[H]	20830-81-3	1.15229	0.937078	0.88222	1.22311	1.07092	t	Polli et al. 2001
19	Desloratadine	[Cl]c3ccc2C(c1ncccc1CCc2c3)=C4CCNCC4	100643-71-8	0.959041	0.859958	1.01623	0.953766	0.961562	T	Chen et al. 2003
20	Dexamethasone	[F][C@]24[C@@](O)([H])C[C@]1(C)[C@](O)(C(=O)CO)[C@@](C)([H])C[C@]1([H])[C@@]2([H])CCC3=CC(=O)C=C[C@@]34C	50-02-2	1.09342	0.993996	1.03776	1.08766	1.08309	T	Polli et al. 2001
21	Digoxin	O[C@@]23CC[C@]([H])(C=1COC(=O)C=1)[C@]2(C)[C@](O)([H])C[C@]4([H])[C@@]3([H])CC[C@@]5([H])C[C@]([H])(CC[C@@]45C)O[C@]8([H])O[C@@](C)([H])[C@]([H])(O[C@]7([H])C[C@](O)([H])[C@]([H])(O[C@@]6([H])O[C@@](C)([H])[C@@](O)([H])[C@](O)([H])C6)[C@](C)([H])O7)[C@@](O)([H])C8	20830-75-5	1.29658	0.919976	1.29134	1.34103	1.25375	t	Troutman et al. 2003 Taub et al. 2005 Liu et al. 2014
22	Domperidone	[Cl]c2cc1n([H])c(=O)n(c1cc2)[C@]5([H])CCN(CCCn4c(=O)n([H])c3ccccc34)CC5	57808-66-9	1.6721	1.57201	1.61569	1.60879	1.51583	T	Mahar et al. 2002 Carrara et al. 2007
23	Eletriptan	O=[S](=O)(CCc3ccc2n([H])cc(C[C@]1([H])CCCN1C)c2c3)c4ccccc4	143322-58-1	1.51764	1.19319	1.35795	1.51186	1.41059	T	Polli et al. 2001 Mahar et al. 2002 Wager et al. 2010
24	Emetine	COc5cc2c(CCN1C[C@]([H])(CC)[C@]([H])(C[C@@]12[H])C[C@]4([H])NCCc3cc(OC)c(cc34)OC)cc5OC	602-59-5	1.46538	1.36598	1.4097	1.45978	1.4481	T	Polli et al. 2001
25	Erythromycin	C[C@]2([H])[C@]([H])(O[C@@]1([H])O[C@](C)([H])C[C@@]([H])(N(C)C)[C@]1(O)[H])[C@@](O)(C)C[C@](C)([H])C(=O)[C@](C)([H])[C@@](O)([H])[C@](O)(C)[C@]([H])(OC(=O)[C@@](C)([H])[C@]2([H])O[C@@]3([H])C[C@@](C)(OC)[C@@](O)([H])[C@](C)([H])O3)CC	114-07-8	1.3927	1.3955	1.44649	1.38575	1.43813	T	Polli et al. 2001 Huang et al. 2006
26	Escitalopram	[F]c1ccc(cc1)[C@]3(OCc2cc(ccc23)C#N)CCCN(C)C	128196-01-0	0.30103	0.40199	0.35826	0.308346	0.406736	T	Wager et al. 2010
27	Estriol	O[C@@]4([H])[C@](O)([H])C[C@]3([H])[C@@]2([H])CCc1cc(O)ccc1[C@@]2([H])CC[C@]34C	50-27-1	0.50515	0.606058	0.562308	0.512304	0.512662	T	Kim et al. 2004
28	Etoposide	O[C@]7([H])[C@]([H])(O[C@@]5([H])c2cc1OCOc1cc2[C@@]([H])(c3cc(OC)c(O)c(c3)OC)[C@]4([H])C(=O)OC[C@]45[H])O[C@]6([H])CO[C@@](C)([H])O[C@]6([H])[C@@]7(O)[H]	33419-42-0	1.27262	1.17201	1.21575	1.27823	1.28925	T	Polli et al. 2001 Troutman et al. 2003
29	Famciclovir	O=C(C)OCC([H])(COC(=O)C)CCn2cnc1cnc(N)nc12	104227-87-4	0.501059	0.602022	0.44576	0.50822	0.485496	T	Mahar et al. 2002
30	Hoechst33342	CCOc1ccc(cc1)c3nc2ccc(cc2n3[H])c5nc4ccc(cc4n5[H])N6CCN(C)CC6	23491-52-3	0.889302	1.01991	0.833742	0.88377	0.904382	T	Polli et al. 2001
31	Indinavir	O[C@]([H])(CN2CCN(Cc1cnccc1)C[C@]2([H])C(=O)NC(C)(C)C)C[C@]([H])(Cc3ccccc3)C(=O)N[C@@]5([H])c4ccccc4C[C@]5(O)[H]	150378-17-9	1.27799	1.17801	1.22181	1.2717	1.2904	T	Polli et al. 2001 Mahar et al. 2002 Gertz et al. 2010
32	Labetalol	O[C@]([H])(CN[C@](C)([H])CCc1ccccc1)c2ccc(O)c(c2)C(=O)N	36894-69-6	0.946943	1.04601	1.00223	0.93975	1.00844	T	Mahar et al. 2002
33	Loperamide	[Cl]c1ccc(cc1)[C@]4(O)CCN(CCC(C(=O)N(C)C)(c2ccccc2)c3ccccc3)CC4	53179-11-6	0.956008	0.85602	0.89972	0.962204	0.91883	T	Polli et al. 2001 Mahar et al. 2002 Feng et al. 2008
34	Lopinavir	O[C@]([H])(C[C@]([H])(NC(=O)[C@]([H])(N1CCCNC1=O)C(C)(C)[H])Cc2ccccc2)[C@]([H])(NC(=O)COc3c(C)cccc3C)Cc4ccccc4	192725-17-0	0.690196	0.79001	0.746214	0.696254	0.698788	T	Luo et al. 2010
35	Methylprednisolone	O[C@]4(CC[C@]3([H])[C@@]2([H])C[C@](C)([H])C1=CC(=O)C=C[C@@]1(C)[C@@]2([H])[C@@](O)([H])C[C@]34C)C(=O)CO	83-43-2	1.1663	0.990192	1.0225	0.986796	1.02268	t	Troutman et al. 2003
36	Methysergide	Cn2cc3C[C@]1([H])N(C)C[C@]([H])(C=C1c4cccc2c34)C(=O)N[C@]([H])(CO)CC	361-37-5	0.487138	0.762952	0.584906	0.741542	0.659736	t	Mahar et al. 2002 Carrara et al. 2007
37	Mitoxantrone	O=C2c3c(C(=O)c1c(O)ccc(O)c12)c(NCCNCCO)ccc3NCCNCCO	65271-80-9	0.528917	0.627962	0.584322	0.53418	0.531274	T	Polli et al. 2001
38	Monensin	CC[C@@]1(O[C@]([H])(CC1)[C@]3(C)CC[C@@]2(O[C@]([H])([C@@](C)([H])[C@]([H])(OC)[C@@](C)([H])C(O)=O)[C@](C)([H])[C@](O)([H])C2)O3)[C@@]4([H])O[C@@]([H])(C[C@]4(C)[H])[C@@]5([H])O[C@](O)(CO)[C@@](C)([H])C[C@]5(C)[H]	22373-78-0	0.459392	0.559952	0.516252	0.466264	0.477822	T	Polli et al. 2001
39	Nelfinavir	CC(C)(C)NC(=O)[C@]2([H])C[C@]1([H])CCCC[C@@]1([H])CN2C[C@@](O)([H])[C@]([H])(C[S]c3ccccc3)NC(=O)c4cccc(O)c4C	159989-64-7	1.19257	1.09194	1.13577	1.18576	1.19801	T	Polli et al. 2001 Mahar et al. 2002
40	Olanzapine	CN1CCN(CC1)C4=Nc2ccccc2Nc3[s]c(C)cc34	132539-06-1	0.30103	0.528994	0.358322	0.308266	0.414618	T	Wager et al. 2010
41	Paliperidone	[F]c2cc1onc(c1cc2)[C@]5([H])CCN(CCc4c(C)nc3n(CCC[C@@]3(O)[H])c4=O)CC5	144598-75-4	0.491362	1.0593	0.737376	0.19271	0.634266	t	Feng et al. 2008 Wager et al. 2010
42	Paroxetine	[F]c1ccc(cc1)[C@]2([H])CCNC[C@@]2([H])COc4cc3OCOc3cc4	61869-08-7	0.491362	0.591932	0.548142	0.498254	0.501456	T	Feng et al. 2008 Wager et al. 2010
43	Perospirone	O=C5N(CCCCN1CCN(CC1)c2n[s]c3ccccc23)C(=O)[C@]4([H])CCCC[C@]45[H]	150915-41-6	0.892095	0.79194	0.948298	0.898222	0.8837	T	Wager et al. 2010
44	Prazosin	O=C(c1occc1)N2CCN(CC2)c4nc3cc(OC)c(OC)cc3c(N)n4	19216-56-9	0.592732	0.665246	0.648328	0.585746	0.580096	T	Polli et al. 2001 Feng et al. 2008
45	Prednisolone	O[C@@]1(CC[C@@]3([H])[C@]1(C)C[C@@](O)([H])[C@@]4([H])[C@@]2(C)C=CC(=O)C=C2CC[C@@]34[H])C(=O)CO	50-24-8	0.764555	0.961428	0.96453	0.671336	0.828078	t	Troutman et al. 2003
46	Prednisone	O[C@]4(CC[C@]3([H])[C@@]2([H])CCC1=CC(=O)C=C[C@@]1(C)[C@@]2([H])C(=O)C[C@]34C)C(=O)CO	53-03-2	0.579784	0.480018	0.636324	0.586294	0.5429	T	Feng et al. 2008
47	Puromycin	OC[C@@]3([H])O[C@@]([H])(n1cnc2c1ncnc2N(C)C)[C@](O)([H])[C@@]3([H])NC(=O)[C@@](N)([H])Cc4ccc(OC)cc4	53-79-2	0.491362	0.591904	0.548308	0.498304	0.501456	T	Polli et al. 2001
48	Quinidine	O[C@]([H])(c2ccnc1ccc(OC)cc12)[C@@]3([H])C[C@@]4([H])CCN3C[C@@]4([H])C=C	56-54-2	1.17085	0.85292	0.663162	0.768178	0.725824	T	Polli et al. 2001 Troutman et al. 2003 Carrara et al. 2007 Feng et al. 2008 Gertz et al. 2010
49	Reserpine	[H]n6c1cc(ccc1c5CCN4C[C@]3([H])C[C@]([H])(OC(=O)c2cc(OC)c(OC)c(c2)OC)[C@@]([H])(OC)[C@]([H])(C(=O)OC)[C@]3([H])C[C@@]4([H])c56)OC	50-55-5	0.569374	0.670002	0.626294	0.57625	0.569964	T	Polli et al. 2001
50	Risperidone	[F]c2cc1onc(c1cc2)[C@]3([H])CCN(CC3)CCc5c(=O)n4CCCCc4nc5C	106266-06-2	0.256076	0.355934	0.199706	0.249724	0.405442	T	Mahar et al. 2002 Feng et al. 2008 Wager et al. 2010
51	Ritonavir	CC(C)([H])c1[s]cc(n1)CN(C)C(=O)N[C@]([H])(C(=O)N[C@]([H])(Cc2ccccc2)C[C@@](O)([H])[C@@]([H])(Cc3ccccc3)NC(=O)OCc4cnc[s]4)C(C)(C)[H]	155213-67-5	1.58903	1.49006	1.53373	1.58372	1.50597	T	Polli et al. 2001 Troutman et al. 2003 Feng et al. 2008
52	Sertindole	[Cl]c2ccc1n(cc(c1c2)[C@]4([H])CCN(CCN3CCNC3=O)CC4)c5ccc([F])cc5	106516-24-9	1.01703	0.91794	1.0743	1.02425	1.03929	T	Wager et al. 2010
53	Sertraline	[Cl]c1cc(ccc1[Cl])[C@@]3([H])CC[C@@]([H])(NC)c2ccccc23	79617-96-2	0.869232	0.900968	1.24068	0.523772	0.85638	t	Feng et al. 2008 Wager et al. 2010
54	Talinolol	O=C(N[C@@]1([H])CCCCC1)Nc2ccc(OC[C@@](O)([H])CNC(C)(C)C)cc2	57460-41-0	1.5006	1.40001	1.44372	1.44641	1.45612	T	Troutman et al. 2003
55	Taxol	O=C(C)O[C@@]17CO[C@]1([H])C[C@@](O)([H])[C@]6(C)C(=O)[C@]([H])(OC(=O)C)[C@]4([H])C(C)(C)[C@@](O)(C[C@]([H])(OC(=O)[C@](O)([H])[C@]([H])(NC(=O)c2ccccc2)c3ccccc3)[C@@]4(C)[H])[C@@]([H])(OC(=O)c5ccccc5)[C@@]67[H]	33069-62-4	1.62021	1.52002	1.56378	1.61384	1.51346	T	Troutman et al. 2003 Taub et al. 2005
56	Terfenadine	OC(c1ccccc1)(c2ccccc2)[C@]4([H])CCN(CCC[C@@](O)([H])c3ccc(cc3)C(C)(C)C)CC4	50679-08-8	0.93852	0.837982	0.881772	0.944196	0.89641	T	Polli et al. 2001 Mahar et al. 2002 Obradovic et al. 2007
57	Trimethoprim	Nc1nc(N)ncc1Cc2cc(OC)c(OC)c(c2)OC	738-70-5	0.443263	0.543974	0.500178	0.43767	0.463604	T	Polli et al. 2001 Mahar et al. 2002
58	Vinblastine	O[C@@]3(C(=O)OC)[C@]([H])(OC(C)=O)[C@@]9(C=CCN8CC[C@@]2(c1cc(c(cc1N(C)[C@@]23[H])OC)[C@]4(C[C@@]7([H])C[C@](O)(CN(CCc6c4n([H])c5ccccc56)C7)CC)C(=O)OC)[C@]89[H])CC	865-21-4	1.77117	1.17017	2.18328	1.76248	1.35256	t	Troutman et al. 2003 Taub et al. 2005 Carrara et al. 2007
59	Vinorelbine	O[C@]3(C(=O)OC)[C@@]([H])(OC(C)=O)[C@]8(CC)C=CCN9CC[C@@]2(c1cc(c(cc1N(C)[C@@]23[H])OC)[C@]7(C[C@@]4([H])CN(CC(CC)=C4)Cc6c5ccccc5n([H])c67)C(=O)OC)[C@]89[H]	71486-22-1	1.84386	1.74399	1.7877	1.83776	1.48873	T	Polli et al. 2001
60	Ximelagatran	O=C(N1CC[C@@]1([H])C(=O)NCc2ccc(cc2)C(NO)=N([H])[H])[C@]([H])(NCC(=O)OCC)[C@@]3([H])CCCCC3	192939-46-1	1.51851	1.41809	1.46178	1.51173	1.47748	T	Eriksson et al. 2006
61	Ziprasidone	[Cl]c2cc1NC(=O)Cc1cc2CCN3CCN(CC3)c5n[s]c4ccccc45	146939-27-7	0.361728	0.462074	0.418256	0.368248	0.42428	T	Wager et al. 2010
62	Zolmitriptan	[H]n1cc(CCN(C)C)c2cc(ccc12)C[C@@]3([H])COC(=O)N3	139264-17-8	0.394452	0.49404	0.45026	0.400176	0.438472	T	Mahar et al. 2002
63	Zotepine	[Cl]c3cc2C(=Cc1ccccc1[S]c2cc3)OCCN(C)C	26615-21-4	0.70757	0.808098	0.651714	0.714206	0.68056	T	Wager et al. 2010
where T and t stand for the training set and test set, respectively.
†Not available

## Sheet: Table S2
Table S2. Optimal runtime parameters for the SVR models.
Parameter	SVR A	SVR B	SVR C	HSVR
SVM type	ε-SVR	ε-SVR	ε-SVR	ε-SVR
Kernal type	RBF†	RBF	RBF	RBF
γ	1	0.11	2	0.03
Cost	64	121.5	256	0.5
ε	0.5	0.28	0.03	0.01
†Radial basis function
